# Supplementary material
Source: HighWire-hosted journal article supplement (https://erj.ersjournals.com/content/49/5/1602275)
Supplement: inline-supplementary-material-1 [file inline-supplementary-material-1.pdf]

## Supplementary file 1.

A blood test (with serum urate level, SSc-specific antibodies and NT-proBNP) was performed. The serum urate level was expressed as milligram per decilitre. SSc-specific antibodies were detected using indirect immunofluorescence on Hep-2000 cells (Immunoconcepts, Sacramento, CA, USA) and a line-immunoassay (INNO-LIA ANA Update, Innogenetics NV, Zwijnaarde, Belgium). Blood samples for NT-proBNP were collected into EDTA tubes, centrifuged and stored at -80°C. NT-proBNP was measured using the AlereTriage<sup>®</sup> NT-proBNP immunoassay test with the AlereTriage<sup>®</sup> MeterPro [23].

Supplementary file 2. 2009-ESC/ERS-guidelines and 2015-ESC/ERS-guidelines [5, 15].

The 2009-screening algorithm recommend referral for RHC in patients with a peak TRV  $>3.4$  m/s,  $2.8 < \text{peak TRV} \leq 3.4$  m/s in combination with symptoms (defined as at least one of the following parameters: current dyspnoea, current syncope/near syncope, current angina, presence of peripheral oedema) or a peak TRV  $\leq 2.8$  m/s in combination with symptoms and additional echocardiographic variables suggestive for PH as used in the original DETECT-study (right atrial area [RA]  $>16$  cm<sup>2</sup> and/or a ratio of right ventricular diameter/left ventricular end diastolic diameter  $>0.8$ ) [15, 16]. When it was not possible to measure the TRV accurately, the 2009-screening algorithm was applied by the combination of symptoms and additional echocardiographic variables suggestive for PH.

According to the 2015-ESC/ERS-guidelines, RHC was recommended when patients had, based on echocardiographic findings, an intermediate or high-risk for PH defined as peak TRV  $>2.8$  m/s or  $\leq 2.8$  m/s (or not measurable) in combination with additional echocardiographic variables suggestive for PH from at least 2 of the 3 different categories (1. the ventricles [right ventricle/left ventricle basal diameter area  $>1.0$ , flattening of the interventricular septum], 2. the pulmonary artery [right ventricular outflow doppler acceleration time  $<105$  msec, early diastolic pulmonary regurgitation velocity  $>2.2$  m/s when pulmonary valve insufficiency  $>1/4$ , pulmonary artery diameter  $>25$  mm] or 3. the vena cava and right atrium [inferior vena cava diameter  $>21$  mm with decreased inspiratory collapse, RA  $>18$  cm<sup>2</sup>]). For 16 patients, 1 additional echocardiographic parameter was not measurable, but this did not influence the classification as low, intermediate or high-risk in all but one (for 11 patients, the pulmonary artery diameter was not measurable -7 had a right ventricular outflow doppler acceleration time  $<105$  msec and 4 had no additional echocardiographic variables concerning the 2 other categories-, for 3 patients flattening of the interventricular septum was not interpretable -1 had additional echocardiographic parameters in the 2 other

categories and 2 in none of the other categories-, and in 2 patients, the inferior vena cava was not visible -1 patient had additional echocardiographic parameters in the 2 other categories and 1 patient only in 1 other category. The last patients was classified as low risk since the RA was not dilated. Besides the above described echocardiographic screening according to the 2015-ESC/ERS-guidelines, screening using a combination of echocardiography in all patients with the DETECT-algorithm in the high-risk subgroup (disease duration >3 years and DLCO <60% pred) was evaluated.

## Supplementary file 3. Subgroup analyses for the LSSc, LcSSc and DcSSc subgroup.

### 1. Subgroup analysis of the LSSc subgroup

#### *Screening, results of the RHC and cost-effectiveness*

4 (19%) of the 21 LSSc patients were recommended for RHC. 3 (75%) patients were recommended by the DETECT-algorithm alone, none by the 2009-guidelines alone and 1 (25%) by both. Step 1 of the DETECT-calculator recommended echocardiography in 8 patients (38%). Step 2 of the DETECT-calculator recommended a RHC in 4 patients (19%). Following the 2009-guidelines, a RHC was recommended in 1 patient (5%) and post hoc in 2 patients (10%) by the 2015-echo-screening and in 3 patients (14%) by the 2015-combined screening.

Of the 4 LSSc patients recommended for RHC, 3 (75%) also underwent a RHC, 2 (67%) patients where RHC was recommended using the DETECT-algorithm alone, no patients using the 2009-guidelines alone, 1 (100%) using both algorithms and post hoc 2 (100%) using the 2015-echo-screening and 3 (100%) using the 2015-combined-screening.

Of the 3 LSSc patients in whom a RHC was performed, PH was diagnosed in 1 patient (1 PH secondary to LHD). No PAH was diagnosed, 2 (67%) had no PH and no patients had borderline PAP.

In our cohort, the average cost per LSSc patient for screening for PAH was 72 euro using the 2009-guidelines, 189 euro using the DETECT-algorithm, 81 euro using the 2015-echo-screening and 103 euro using the 2015-combined-screening respectively (table 2 and supplementary file 4).

### 2. Subgroup analysis of the LcSSc

### *Screening, results of the RHC, incidence and PPV and cost-effectiveness*

45 (32%) of the 139 LcSSc patients were recommended for RHC. 33 (73%) patients were recommended by the DETECT-algorithm alone, 1 (2%) by the 2009-guidelines alone and 11 (24%) by both. Step 1 of the DETECT-calculator recommended echocardiography in 87 patients (63%). Step 2 of the DETECT-calculator recommended a RHC in 44 patients (32%). Following the 2009-guidelines, a RHC was recommended in 12 patients (9%) and post hoc in 23 patients (17%) by the 2015-echo-screening and in 27 patients (19%) by the 2015-combined screening.

Of the 45 LcSSc recommended for RHC, 39 (87%) also underwent a RHC, 27 (82%) of the patients where RHC was recommended using the DETECT-algorithm alone, 1 (100%) using the 2009-guidelines alone, 11 (100%) using both algorithms and post hoc 19 (83%) using the 2015-echo-screening and 21 (78%) using the 2015-combined-screening.

Of the 39 LcSSc patients in whom a RHC was performed, PH was diagnosed in 7 patients (3 PAH, 3 PH secondary to LHD and 1 PH secondary to pulmonary embolism).

23 (59%) had no PH and 9 (23%) had borderline PAP. RHC had been recommended by the DETECT-algorithm in 8 of the 9 (89%) patients diagnosed with borderline PAP, whereas the 2009-guidelines only recommended RHC in 4 (44%) of them.

Three LcSSc patients were diagnosed with PAH. RHC was recommended in the 3 patients by all screening algorithms. For 139 LcSSc patients, the PPV was 8%, 95% CI 3-21% (3/38) for the DETECT-algorithm, 25%, 95% CI 9-53% (3/12) for the 2009-guidelines, 27%, 95% CI 10-57% (3/11) for screening with both algorithms and post hoc 16%, 95% CI 6-38% (3/19) for the 2015-echo-screening and 14%, 95% CI 5-35% (3/21) for the 2015-combined-screening.

In our cohort, the average cost per LcSSc patient for screening for PAH was 79 euro using the 2009-guidelines, 229 euro using the DETECT-algorithm and post hoc 89 euro using the 2015-echo-screening and 102 euro using the 2015-combined-screening respectively (table 2 and supplementary file 4).

### 3. Subgroup analysis of the DcSSc

#### *Screening, results of the RHC, Cost-effectiveness*

14 (40%) of the 35 DcSSc patients were recommended for RHC. 10 (71%) patients were recommended by the DETECT-algorithm alone, 3 (21%) by the 2009-guidelines alone and 1 (7%) by both. Step 1 of the DETECT-calculator recommended echocardiography in 23 patients (66%). Step 2 of the DETECT-calculator recommended a RHC in 11 patients (31%). Following the 2009-guidelines, a RHC was recommended in 4 patients (11%) and post hoc in 9 patients (26%) by the 2015-echo-screening and in 10 patients (29%) by the 2015-combined screening.

Of the 14 DcSSc recommended for RHC, 11 (79%) also underwent a RHC, 7 (70%) of the patients where RHC was recommended using the DETECT-algorithm alone, 3 (100%) using the 2009-guidelines alone, in 1 patient (100%) using both algorithms and post hoc 7 (78%) using the 2015-echo-screening and 8 (80%) using the 2015-combined-screening.

Of the 11 in whom a RHC was performed, PH was diagnosed in 1 patients (1 PH secondary to LHD). No patients were diagnosed with PAH, 5 (45%) had no PH and 5 (45%) had borderline PAP. RHC had been recommended by the DETECT-algorithm in 5 (100%) patients diagnosed with borderline PAP, whereas the 2009-guidelines recommended RHC in no DcSSc patients.

In our cohort, the average cost per DcSSc patient for screening for PAH was 85 euro using the 2009-guidelines, 223 euro using the DETECT-algorithm and post hoc 101 euro using the 2015-echo-screening and 157 euro using the 2015-combined-screening respectively (table 2 and supplementary file 4).

Supplementary file 4. Cost per patient in the subgroups for screening following the different screening algorithms.

|                                     | price       | N  | LSSc<br>cost        | Cost per<br>patient | N   | LcSSc<br>Cost        | Cost per<br>patient | N  | DcSSc<br>Cost       | cost per<br>patient |
|-------------------------------------|-------------|----|---------------------|---------------------|-----|----------------------|---------------------|----|---------------------|---------------------|
| <b>2009-guidelines</b>              |             |    |                     |                     |     |                      |                     |    |                     |                     |
| Echocardiography *                  | 63.21 euro  | 21 | 1327.41 euro        |                     | 139 | 8786.19 euro         |                     | 35 | 2212.35 euro        |                     |
| RHC *                               | 187.22 euro | 1  | 187.22 euro         |                     | 12  | 2246.64 euro         |                     | 4  | 748.88 euro         |                     |
| Total cost                          |             |    | <b>1514.63 euro</b> | <b>72.13 euro</b>   |     | <b>11032.83 euro</b> | <b>79.37 euro</b>   |    | <b>2961.23 euro</b> | <b>84.61 euro</b>   |
| <b>DETECT-<br/>algorithm</b>        |             |    |                     |                     |     |                      |                     |    |                     |                     |
| FVC *                               | 22 euro     | 21 | 462 euro            |                     | 139 | 3058 euro            |                     | 35 | 770 euro            |                     |
| DLCO *                              | 47 euro     | 21 | 987 euro            |                     | 139 | 6533 euro            |                     | 35 | 1645 euro           |                     |
| NT-proBNP #                         | 11 euro     | 21 | 231 euro            |                     | 139 | 1529 euro            |                     | 35 | 385 euro            |                     |
| Serum urate *                       | 0.48 euro   | 21 | 10.08 euro          |                     | 139 | 66.72 euro           |                     | 35 | 16.80 euro          |                     |
| ECG *                               | 17.77 euro  | 21 | 373.17 euro         |                     | 139 | 2470.03 euro         |                     | 35 | 621.95 euro         |                     |
| ACA #                               | 40 euro     | 21 | 840 euro            |                     | 139 | 5560 euro            |                     | 35 | 1400 euro           |                     |
| Echocardiography *                  | 63.21 euro  | 8  | 505.68 euro         |                     | 87  | 5499.27 euro         |                     | 23 | 1453.83 euro        |                     |
| RHC *                               | 187.22 euro | 3  | 561.66 euro         |                     | 38  | 7114.36 euro         |                     | 8  | 1497.76 euro        |                     |
| Total cost                          |             |    | <b>3970.59 euro</b> | <b>189.08 euro</b>  |     | <b>31830.38 euro</b> | <b>229 euro</b>     |    | <b>7790.34 euro</b> | <b>222.58 euro</b>  |
| <b>2015-echo-<br/>screening</b>     |             |    |                     |                     |     |                      |                     |    |                     |                     |
| Echocardiography *                  | 63.21 euro  | 21 | 1327.41 euro        |                     | 139 | 8786.19 euro         |                     | 35 | 2212.35 euro        |                     |
| RHC *                               | 187.22 euro | 2  | 374.44 euro         |                     | 19  | 3557.18 euro         |                     | 7  | 1310.54 euro        |                     |
| Total cost                          |             |    | <b>1701.85 euro</b> | <b>81.04 euro</b>   |     | <b>12343.37 euro</b> | <b>88.80 euro</b>   |    | <b>3522.89 euro</b> | <b>100.65 euro</b>  |
| <b>2015-combined-<br/>screening</b> |             |    |                     |                     |     |                      |                     |    |                     |                     |
| FVC *                               | 22 euro     | 2  | 44 euro             |                     | 11  | 242 euro             |                     | 13 | 286 euro            |                     |
| DLCO *                              | 47 euro     | 2  | 94 euro             |                     | 11  | 517 euro             |                     | 13 | 611 euro            |                     |



|                    |             |    |                     |                    |                      |                    |                     |                    |
|--------------------|-------------|----|---------------------|--------------------|----------------------|--------------------|---------------------|--------------------|
| NT-proBNP #        | 11 euro     | 2  | 22 euro             | 11                 | 121 euro             | 13                 | 143 euro            |                    |
| Serum urate *      | 0.48 euro   | 2  | 0.96 euro           | 11                 | 5.28 euro            | 13                 | 6.24 euro           |                    |
| ECG *              | 17.77 euro  | 2  | 35.54 euro          | 11                 | 195.47 euro          | 13                 | 231.01 euro         |                    |
| ACA #              | 40 euro     | 2  | 80 euro             | 11                 | 440 euro             | 13                 | 520 euro            |                    |
| Echocardiography * | 63.21 euro  | 21 | 1327.41 euro        | 139                | 8786.19 euro         | 35                 | 2212.35 euro        |                    |
| RHC *              | 187.22 euro | 3  | 561.66 euro         | 21                 | 3931.62 euro         | 8                  | 1497.76 euro        |                    |
| Total cost         |             |    | <b>2165.57 euro</b> | <b>103.12 euro</b> | <b>14238.56 euro</b> | <b>102.44 euro</b> | <b>5507.36 euro</b> | <b>157.35 euro</b> |

LSSc: limited systemic sclerosis, LcSSc: limited cutaneous systemic sclerosis, DcSSc: diffuse cutaneous systemic sclerosis, price: cost price for the investigation according to the Belgian RIZIV/INAMI (rijksdienst voor ziekte- en invaliditeitsverzekering/ l'institut national d'assurance maladie invalidité) nomenclature for \* and according to the expected best local estimate of cost for # [29], N: number of patients, RHC: right heart catheterization, FVC: forced vital capacity, DLCO: diffusing capacity of the lung for carbon monoxide, NT-proBNP: N-terminal proB-type natriuretic peptide, ECG: electrocardiography, ACA: anti-centromere antibodies, 2015-echo-screening: screening following the 2015-ESC/ERS-guidelines using echocardiographic parameters, 2015-combined-screening: screening following the 2015-ESC/ERS-guidelines using the combination of echocardiographic parameters for all patients included in the cohort with the DETECT-algorithm in the high-risk subgroup (with disease duration >3 years and DLCO <60% pred).
